# Supplementary material for: A near-infrared light-driven photoelectrochemical aptasensing platform for adenosine triphosphate detection based on Yb-doped Bi2S3 nanorods
Source: Royal Society of Chemistry journal article supplement (doi:10.1039/d2tb00180b), 2022-01-01
Supplement: d2tb00180b1.pdf [file d2tb00180b1.pdf]

## Supporting Information

### **Near-infrared light-driven photoelectrochemical aptasensing platform for adenosine triphosphate detection based on Yb-doped Bi<sub>2</sub>S<sub>3</sub> nanorods**

Jie Gao,<sup>ab</sup> Yifan Ding,<sup>a</sup> Kai Yan<sup>a</sup> and Jingdong Zhang<sup>a\*</sup>

<sup>a</sup> Key Laboratory of Material Chemistry for Energy Conversion and Storage (Ministry of Education), Hubei Key Laboratory of Bioinorganic Chemistry & Materia Medica, School of Chemistry and Chemical Engineering, Huazhong University of Science and Technology, Luoyu Road 1037, Wuhan, 430074, China

<sup>b</sup> School of Chemistry and Chemical Engineering, Henan Normal University, Xinxiang, Henan, 453007, China

\*Corresponding author. E-mail address: zhangjd@mail.hust.edu.cn (J. Zhang)

### *Chemicals and materials*

Ytterbium(III) chloride hexahydrate ( $\text{YbCl}_3 \cdot 6\text{H}_2\text{O}$ ) and sodium sulfide nonahydrate ( $\text{Na}_2\text{S} \cdot 9\text{H}_2\text{O}$ ) were acquired from Aladdin Bio-Chem Technology Co., Ltd. (Shanghai, China). Bismuth nitrate pentahydrate ( $\text{Bi}(\text{NO}_3)_3 \cdot 5\text{H}_2\text{O}$ ), urea ( $\text{CO}(\text{NH}_2)_2$ ), ammonium phosphate monobasic ( $\text{NH}_4\text{H}_2\text{PO}_4$ ), methanol and ethylene glycol were supplied by Sinopharm Chemical Reagent Co. Ltd. (Shanghai, China). Adenosine triphosphate (ATP) was obtained from Sigma-Aldrich Co., Ltd. ATP-binding DNA aptamer with sequence of 5'-AGA GAA CCT GGG GGA GTA TTG CGG AGG AAG GTC ATA GTA ACT-3' was synthesized by Shanghai Sangon Biotech Co., Ltd. (Shanghai, China). The aptamer was diluted with TE buffer (pH 8.0) and stored at 4 °C for further use.

### *Apparatus and procedure*

The morphology and composition of samples were performed on a SU8010 field emission scanning electron microscope (SEM, Hitachi, Japan) equipped with energy dispersive spectroscopy (EDS). The crystalline phase was characterized by an Empyrean X-ray diffractometer (XRD, PANalytical B.V., Netherlands). The X-ray photoelectron spectra (XPS) were recorded on an AXIS ULTRADLD-600W spectrometer (Kratos Company, England). The diffuse reflectance spectra (DRS) were analyzed by using a UV-3600 spectrophotometer (SHIMADZU, Japan).

The PEC measurements were carried out on a CHI830D electrochemical working station (Shanghai Chenhua Instrument Co. Ltd., China) using a conventional three-electrode system. In PEC system, a CEL-S500/350 xenon lamp (CEAULIGHT Co., China) with an optical filter ( $\lambda > 800 \text{ nm}$ ) was employed as the irradiation source, and

the distance between the lamp and working electrode surface was 2 cm.

The high-performance liquid chromatograph (HPLC) measurements were performed on an Agilent (USA) 1100 module system with C18 column (150 mm × 4.6 mm). The mobile phase was a 90:10 (v/v) mixture of 20 mmol·L<sup>-1</sup> NH<sub>4</sub>H<sub>2</sub>PO<sub>4</sub>/methanol with flow rate of 1 mL/min. Detection wavelength was set at 260 nm and the column temperature was 30 °C.

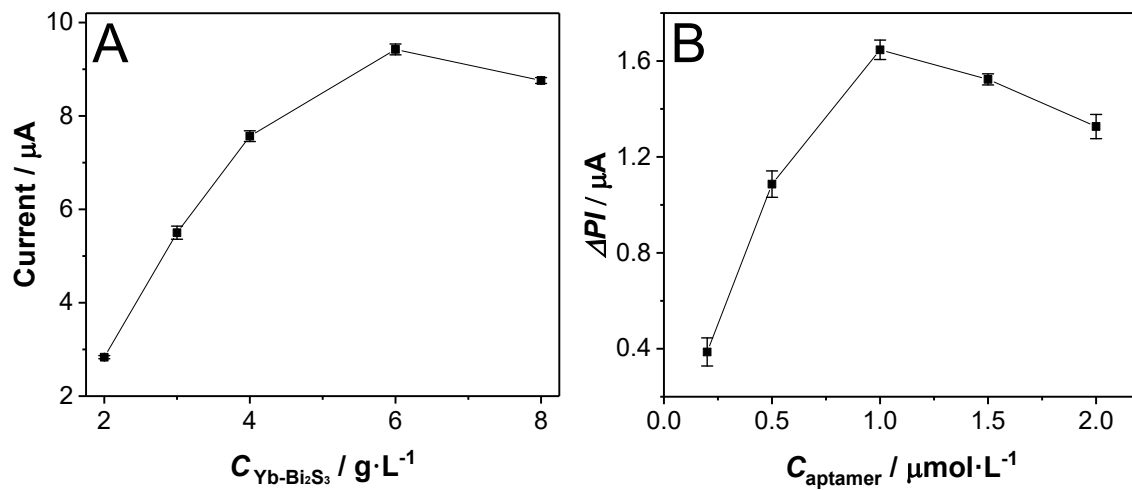

**Fig. S1** Influence of (A) the concentration of  $\text{Yb-Bi}_2\text{S}_3$  and (B) aptamer concentration.

Error bars are derived from the standard deviation of three measurements.

**Table S1** Analytical performances of different methods for ATP detection.

| Detection methods        | Linear range<br>(nmol·L <sup>-1</sup> ) | LOD (nmol·L <sup>-1</sup> )<br><sup>1)</sup> | Reference |
|--------------------------|-----------------------------------------|----------------------------------------------|-----------|
| Electrochemiluminescence | 10 ~ 1×10 <sup>6</sup>                  | 10                                           | 1         |
| Electrochemiluminescence | 1×10 <sup>-2</sup> ~ 1×10 <sup>8</sup>  | 2.9×10 <sup>-3</sup>                         | 2         |
| Electrochemistry         | 10 ~ 850                                | 5                                            | 3         |
| Electrochemistry         | 1×10 <sup>-4</sup> ~ 5                  | 1×10 <sup>-4</sup>                           | 4         |
| Electrochemistry         | 1×10 <sup>-3</sup> ~ 1×10 <sup>4</sup>  | 3.76×10 <sup>-5</sup>                        | 5         |
| Colorimetry              | 50 ~ 1000                               | 50                                           | 6         |
| Fluorescence             | 10 ~ 4.5×10 <sup>5</sup>                | 5                                            | 7         |
| Fluorescence             | 0 ~ 100                                 | 0.6                                          | 8         |
| PEC                      | 0.3 ~ 200                               | 0.1                                          | 9         |
| PEC                      | 1×10 <sup>-4</sup> ~ 10                 | 2.5×10 <sup>-5</sup>                         | 10        |
| PEC                      | 0.5 ~ 300                               | 0.1                                          | This work |

**Table S2** Determination of ATP in human serum by the proposed sensor and HPLC method (n = 3).

| Spiked<br>(nmol·L <sup>-1</sup> ) | Found<br>(nmol·L <sup>-1</sup> ) | Recovery (%) | RSD (%) | HPLC method<br>(nmol·L <sup>-1</sup> ) |
|-----------------------------------|----------------------------------|--------------|---------|----------------------------------------|
| 50.00                             | 54.39                            | 108.8        | 6.74    | 55.27                                  |
| 100.0                             | 103.4                            | 103.4        | 3.81    | 104.3                                  |
| 200.0                             | 205.7                            | 102.9        | 5.16    | 194.6                                  |

## References

1. C. Tian, J. Xu and H. Chen, *Chem. Commun.*, 2012, **48**, 8234-8236.
2. Z. Huang, S. Yu, M. Jian, Z. Weng, H. Deng, H. Peng and W. Chen, *Anal. Chem.*, 2022, **94**, 2341-2347.
3. M. Mashhadizadeh, N. Naseri and M. A. Mehrgardi, *J. Iran. Chem. Soc.*, 2017, **14**, 2007-2016.
4. G. Wang, X. Su, Q. Xu, G. Xu, J. Lin and X. Luo, *Biosens. Bioelectron.*, 2018, **101**, 129-134.
5. R. Zheng, B. He, L. Xie, L. Li, J. Yang, R. Liu, W. Ren, Z. Suo, Y. Xu and Z. Qu, *Electroanal.*, 2022, **34**, 74-82.
6. Y. Huo, L. Qi, X. Lv, T. Lai, J. Zhang and Z. Zhang, *Biosens. Bioelectron.*, 2016, **78**, 315-320.
7. Q. Huang, Q. Li, Y. Chen, L. Tong, X. Lin, J. Zhu and Q. Tong, *Sensor Actuat. B: Chem.*, 2018, **276**, 82-88.
8. M. Yu, Y. Yao, B. Cui, C. Sun, X. Zhao, Y. Wang, G. Q. Liu, H. Cui and Z. Zeng, *ACS Appl. Nano Mater.*, 2019, **2**, 48-57.
9. Y. Liu, H. Ma, Y. Zhang, X. Pang, D. Fan, D. Wu and Q. Wei, *Biosens. Bioelectron.*, 2016, **86**, 439-445.
10. Y. Wang, J. Xu, C. Ma, S. Li, J. Yu, S. Ge and M. Yan, *J. Mater. Chem. B*, 2014, **2**, 3462-3468.
